# Supplementary material for: Dual transcriptional profiling of mice and Toxoplasma gondii during acute and chronic infection
Source: PubMed Central journal article supplement (PMC4177681; doi:10.1186/1471-2164-15-806), 2014-09-20
Supplement: 12864_2014_6483_MOESM5_ESM.pdf [file 12864_2014_6483_MOESM5_ESM.pdf]

| KEGG pathway                              | number of genes | p-value  |
|-------------------------------------------|-----------------|----------|
| cytokine-cytokine receptor interaction    | 86              | 6.30E-26 |
| hematopoietic cell lineage                | 38              | 1.60E-15 |
| Cell adhesion molecules                   | 53              | 2.10E-15 |
| graft-versus-host disease                 | 31              | 3.50E-15 |
| natural killer cell mediated cytotoxicity | 45              | 2.20E-14 |
