# Supplementary material for: Dual transcriptional profiling of mice and Toxoplasma gondii during acute and chronic infection
Source: PubMed Central journal article supplement (PMC4177681; doi:10.1186/1471-2164-15-806), 2014-09-20

# NATURAL KILLER CELL MEDIATED CYTOTOXICITY

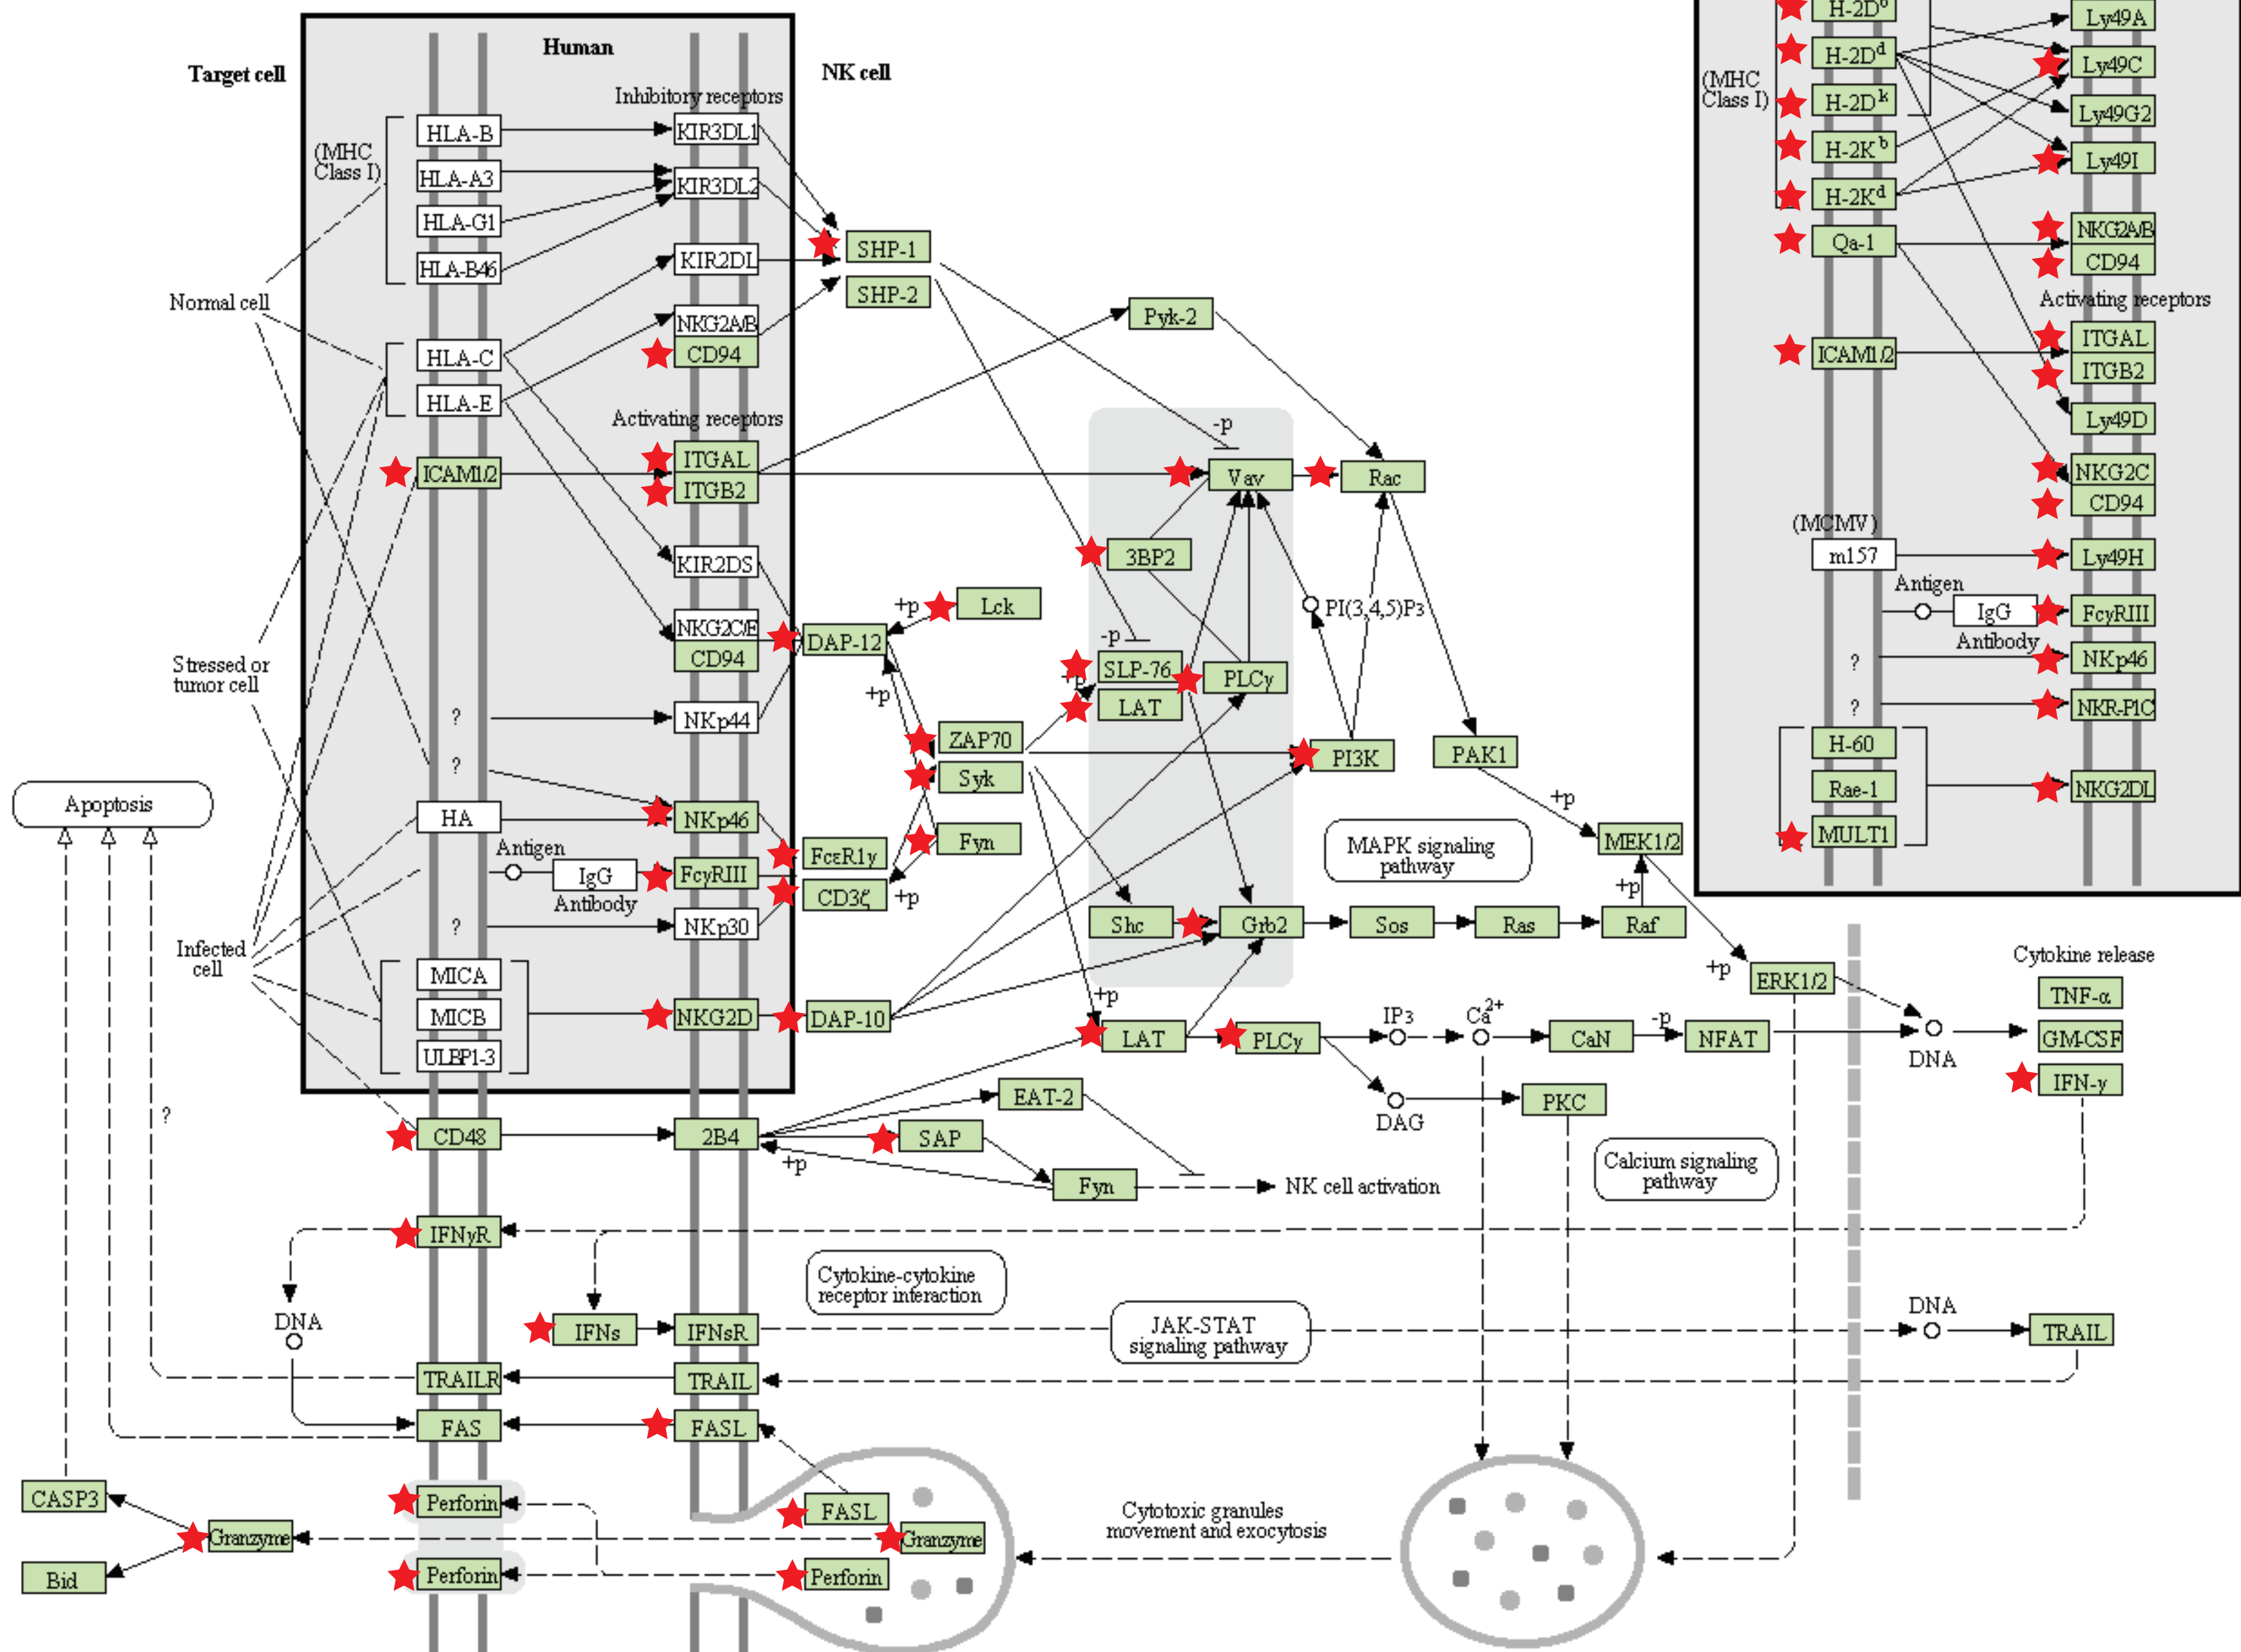

Supplement: 12864_2014_6483_MOESM6_ESM.pdf [file 12864_2014_6483_MOESM6_ESM.pdf]
